# Supplementary material for: Organic small molecular heterostructures for enhanced photocatalytic hydrogen evolutionviaisomer engineering
Source: Royal Society of Chemistry journal article supplement (doi:10.1039/d2ta09970e), 2023-01-01
Supplement: d2ta09970e1.pdf [file d2ta09970e1.pdf]

**Supporting Information for**

**Organic Small Molecular Heterostructures for Enhanced Photocatalytic  
Hydrogen Evolution via Isomer Engineering**

Qiankun Zhang, Dongye Li, Zijie Zhao, Kunpeng Zheng, Qian Wang, Binbin Wang and Xiaojing Long\*

State Key Laboratory of Bio-fibers and Eco-textiles, Collaborative Innovation Center of Shandong Marine Biobased Fibers and Ecological textiles, Institute of Marine Biobased Materials, College of Materials Science and Engineering, Qingdao University, Qingdao 266071, P. R. China.

\* To whom correspondence should be addressed. E-mail: Xiaojing Long (longxj@qdu.edu.cn)

**Contents:**

- 1. Structural and morphology characterization**
- 2. Stability of P-TP/g-CN before and after HER reaction.**
- 3. NMR spectra**

## 1. Structural and morphology characterization

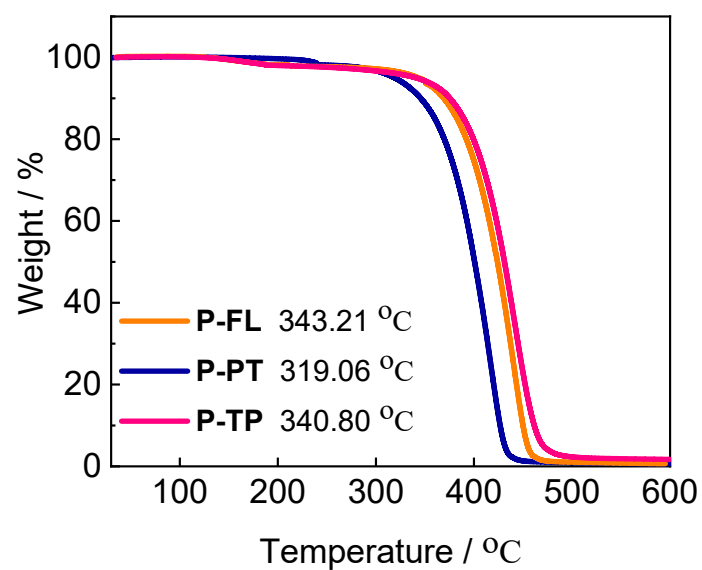

**Fig. S1** TGA curves of **P-FL**, **P-PT**, and **P-TP**.

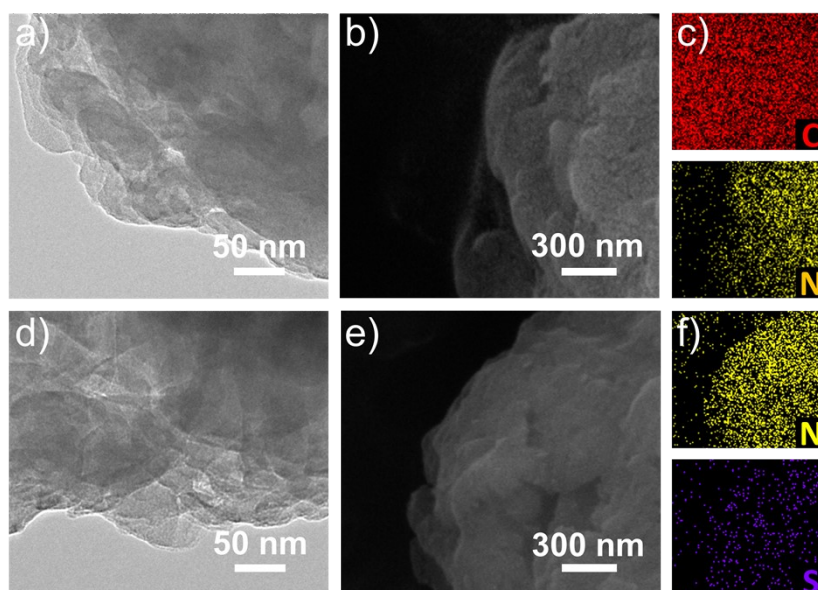

**Fig. S2** (a) TEM image, (b) SEM image, and (c) EDS elements mapping of **P-FL/g-CN**. (d) TEM image, (e) SEM image, and (f) EDS elements mapping of **P-PT/g-CN**.

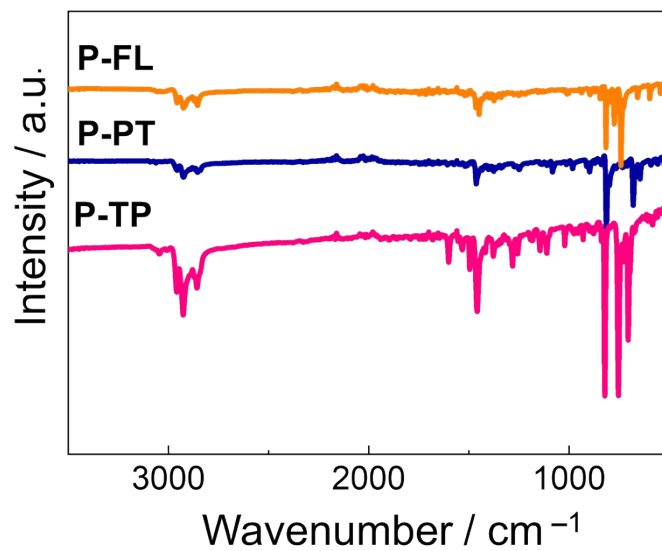

Fig. S3 FT-IR spectra of P-FL, P-PT, and P-TP.

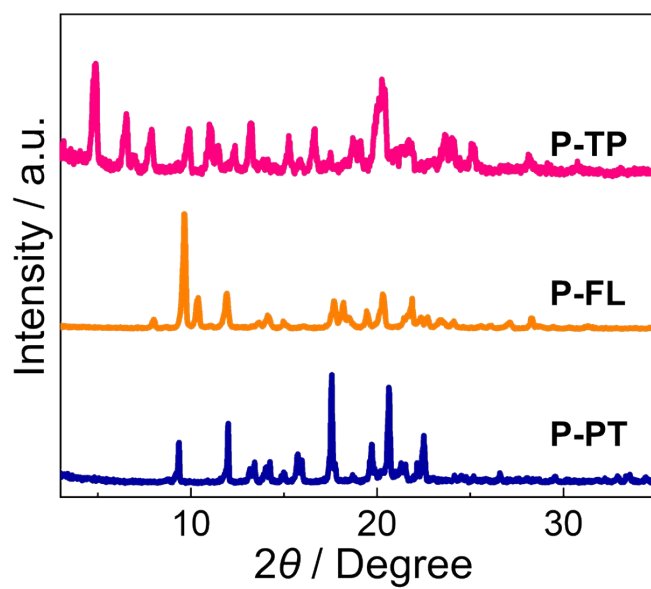

Fig. S4 XRD spectra of P-FL, P-PT, and P-TP.

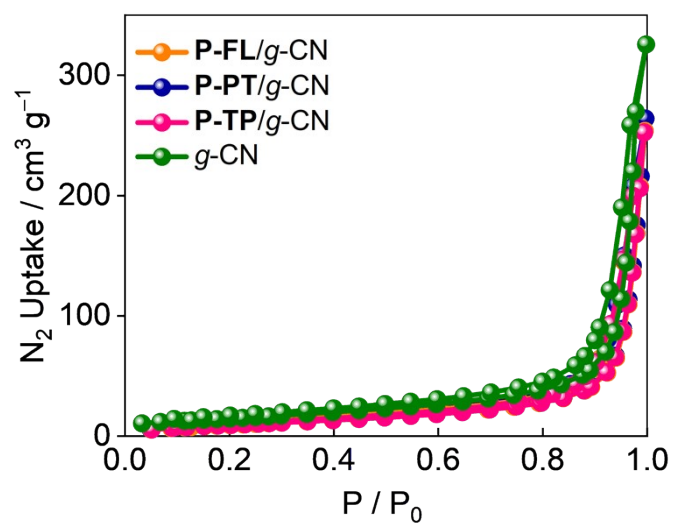

**Fig. S5**  $\text{N}_2$  adsorption isotherms of **P-FL/g-CN**, **P-PT/g-CN**, **P-TP/g-CN**, and **g-CN**.

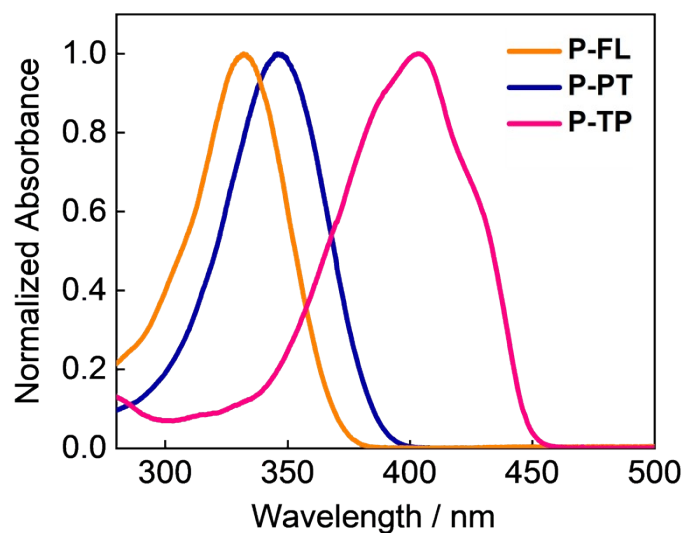

**Fig. S6** UV-vis absorption spectra of **P-FL**, **P-PT**, and **P-TP** in  $\text{CH}_2\text{Cl}_2$  solution.

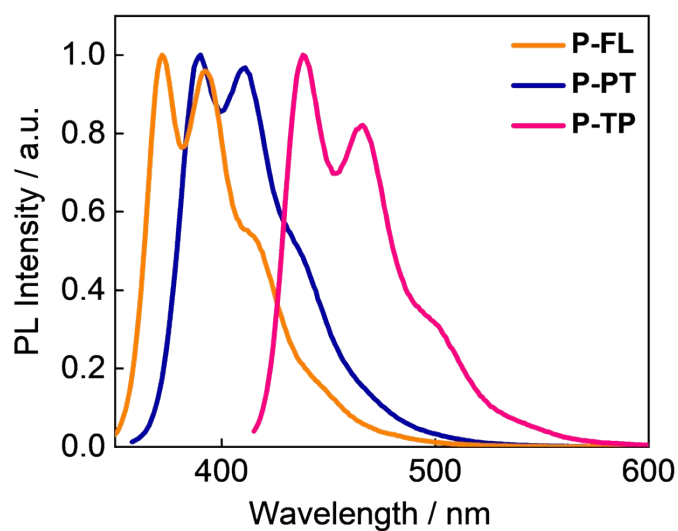

**Fig. S7.** PL spectra of **P-FL**, **P-PT**, and **P-TP** in CH<sub>2</sub>Cl<sub>2</sub> solution.

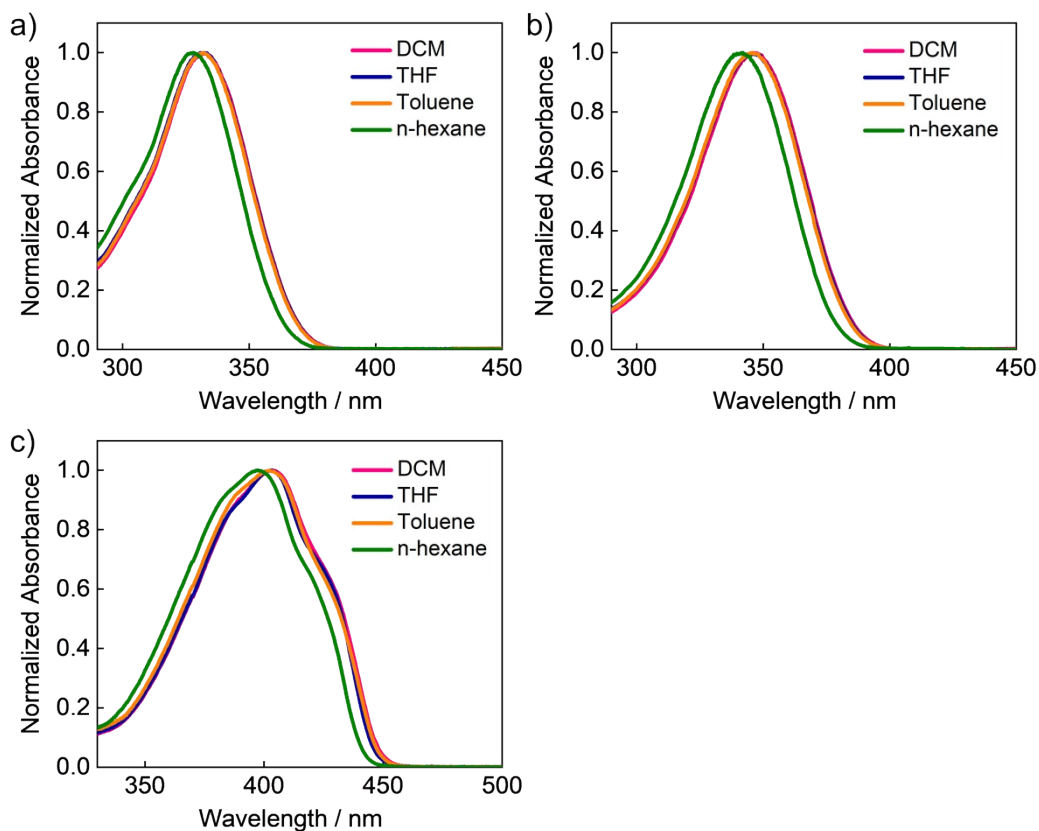

**Fig. S8** UV-vis absorption spectra of (a)**P-FL**, (b) **P-PT**, and (c) **P-TP** in different solutions.

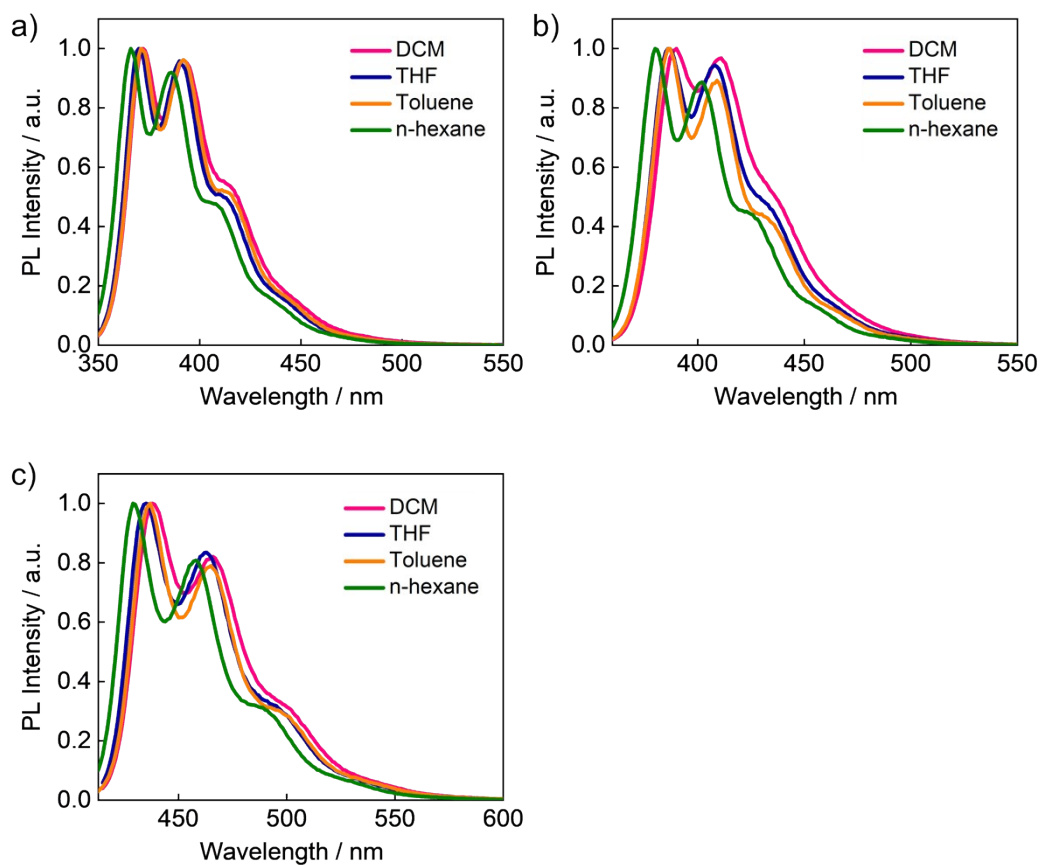

**Fig. S9** PL spectra of (a)P-FL, (b) P-PT, and (c) P-TP in different solutions.

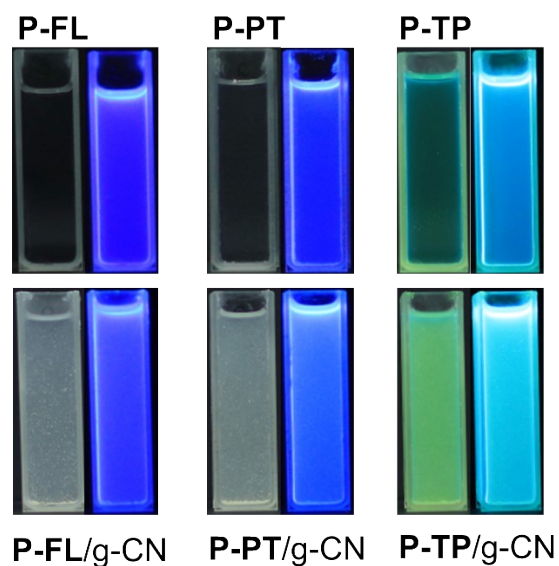

**Fig. S10.** Color change of g-CN before and after adding it to the  $\text{CH}_2\text{Cl}_2$  solution of three materials.

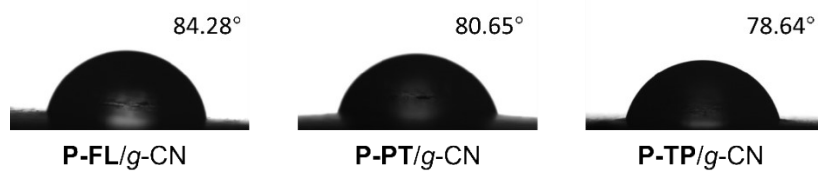

Fig. S11 Images of contact angle measurement of **P-FL/g-CN**, **P-PT/g-CN**, **P-TP/g-CN**

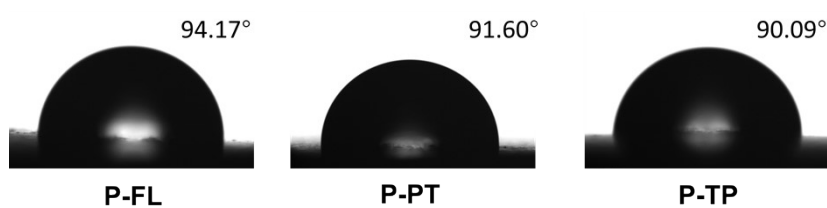

Fig. S12 Images of contact angle measurement of **P-FL**, **P-PT**, **P-TP**

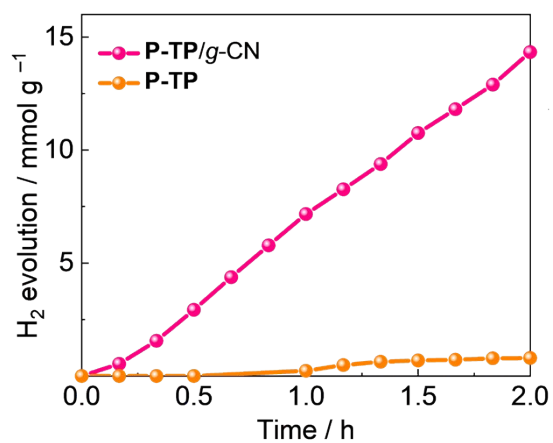

Fig. S13 Photocatalytic H<sub>2</sub> evolution rates of **P-TP**, **P-TP/g-CN**

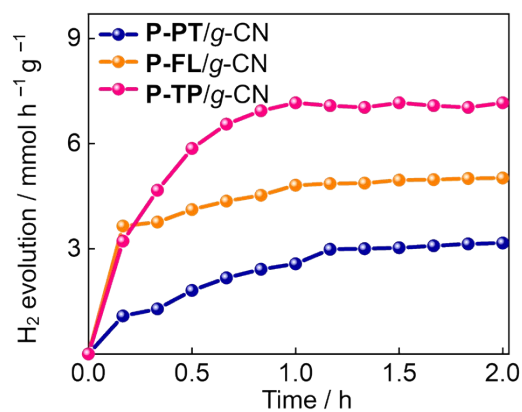

**Figure S14.** Time-dependent photocatalytic hydrogen evolution of **P-FL/g-CN**, **P-PT/g-CN**, and **P-TP/g-CN**.

**Table S1** Relative ratios of two carbon species determined by C 1s spectra for samples

| Sample           | C=C/C-C             |          |    | N-C=N               |           |    |
|------------------|---------------------|----------|----|---------------------|-----------|----|
|                  | Binding Energy (eV) | area     | %  | Binding Energy (eV) | area      | %  |
| g-CN             | 284.80              | 16859.68 | 14 | 288.44              | 103050.00 | 86 |
| <b>P-FL/g-CN</b> | 284.80              | 55491.72 | 39 | 288.43              | 85805.55  | 61 |
| <b>P-PT/g-CN</b> | 284.80              | 43976.33 | 34 | 288.44              | 85535.40  | 66 |
| <b>P-TP/g-CN</b> | 284.80              | 63067.53 | 40 | 288.25              | 94800.29  | 60 |



**Table S2** Relative ratios of two carbon species determined by N 1s spectra for samples

| Sample    | C-N=C          |          |      | N-(C) <sub>3</sub> |          |      | N-H            |          |      |
|-----------|----------------|----------|------|--------------------|----------|------|----------------|----------|------|
|           | Binding        | area     | %    | Binding            | area     | %    | Binding        | area     | %    |
|           | Energy<br>(eV) |          |      | Energy<br>(eV)     |          |      | Energy<br>(eV) |          |      |
| g-CN      | 398.68         | 147829.1 | 69.1 | 399.86             | 39318.55 | 18.4 | 401.00         | 26641.82 | 12.5 |
| P-FL/g-CN | 398.43         | 102606.8 | 63.2 | 399.29             | 45914.87 | 28.3 | 400.83         | 13838.84 | 8.5  |
| P-PT/g-CN | 398.3          | 93113.55 | 59.4 | 399.2              | 45497.79 | 29.0 | 400.76         | 18206.55 | 11.6 |
| P-TP/g-CN | 398.16         | 115149.8 | 67.3 | 399.2              | 38127.16 | 22.3 | 400.63         | 17808.56 | 10.4 |

**Table S3** Optical, electrochemical and DFT calculation data for **P-FL**, **P-PT** and **P-TP**.

| Compound | $\lambda^{\max}$ / nm | $E_g$ (eV) <sup>a</sup> | $E_{\text{onset}}^{\text{ox1}}$ (V) <sup>b</sup> | LUMO (eV) <sup>c</sup> | HOMO (eV) <sup>d</sup> | LUMO (eV) <sup>e</sup> | HOMO (eV) <sup>e</sup> | $E_g$ (eV) <sup>e</sup> |
|----------|-----------------------|-------------------------|--------------------------------------------------|------------------------|------------------------|------------------------|------------------------|-------------------------|
| P-FL     | 340                   | 3.15                    | 0.92                                             | -2.57                  | -5.72                  | -1.32                  | -5.34                  | 4.02                    |
| P-PT     | 349                   | 3.13                    | 0.29                                             | -1.96                  | -5.09                  | -1.38                  | -5.14                  | 3.76                    |
| P-TP     | 371                   | 2.82                    | 0.50                                             | -2.48                  | -5.30                  | -1.71                  | -4.93                  | 3.22                    |

<sup>a</sup>Estimated from the onset absorption; <sup>b</sup>Onset potential; <sup>c</sup>Calculated from  $E_{\text{LUMO}} = E_{\text{HOMO}} + E_g^{\text{Opt}}$ ;

<sup>d</sup>Calculated from  $E_{\text{HOMO}} = -(E_{\text{onset}}^{\text{ox1}} + 4.8)$ ; <sup>e</sup>Estimated from DFT calculations

**Table S4** Comparison of photocatalytic hydrogen evolution performances under ambient conditions of recently-reported g-CN-based photocatalysts.

| Material structure                                | Co-catalyst  | Light source                               | H <sub>2</sub> evolution                   | Ref       |
|---------------------------------------------------|--------------|--------------------------------------------|--------------------------------------------|-----------|
| MWCNT/g-CN                                        | None         | 300 W Xenon arc lamp ( $\lambda > 395$ nm) | 44 $\mu\text{mol h}^{-1}\text{g}^{-1}$     | [1]       |
| TiO <sub>2</sub> /g-CN                            | None         | LEDs (3 W, 420 nm)                         | 112 $\mu\text{mol h}^{-1}\text{g}^{-1}$    | [2]       |
| rGO/g-CN                                          | Pt (1.0 wt%) | LEDs (3 W, 420 nm)                         | 874 $\mu\text{mol h}^{-1}\text{g}^{-1}$    | [3]       |
| CdS/g-C <sub>3</sub> N <sub>4</sub> /CuS          | None         | 350 W Xenon arc lamp ( $\lambda > 420$ nm) | 1151.2 $\mu\text{mol h}^{-1}\text{g}^{-1}$ | [4]       |
| Carbon fiber/g-C <sub>3</sub> N <sub>4</sub>      | Pt (1.0 wt%) | 350 W Xenon arc lamp ( $\lambda > 420$ nm) | 1081 $\mu\text{mol h}^{-1}\text{g}^{-1}$   | [5]       |
| PCN/TBT                                           | Pt (3.0 wt%) | 300 W Xenon arc lamp (AM 1.5G)             | 4630 $\mu\text{mol h}^{-1}\text{g}^{-1}$   | [6]       |
| MoS <sub>2</sub> /g-C <sub>3</sub> N <sub>4</sub> | None         | 300 W Xe lamp ( $\lambda > 420$ nm)        | 12 mmol h <sup>-1</sup> g <sup>-1</sup>    | [7]       |
| P3/g-C <sub>3</sub> N <sub>4</sub>                | Pt (1.0 wt%) | 300 W Xe lamp ( $\lambda > 420$ nm)        | 13 mmol h <sup>-1</sup> g <sup>-1</sup>    | [8]       |
| P-TP/g-CN                                         | Pt (3.0 wt%) | 300 W Xe lamp ( $\lambda > 420$ nm)        | 7.1 mmol h <sup>-1</sup> g <sup>-1</sup>   | This work |

## 2. Stability of P-TP/g-CN before and after HER reaction.

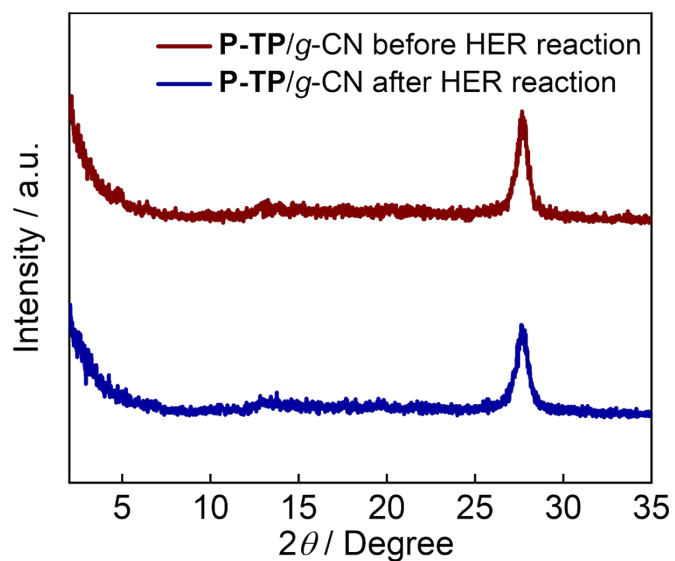

**Fig. S15** XRD patterns of P-TP/g-CN before and after HER reaction.

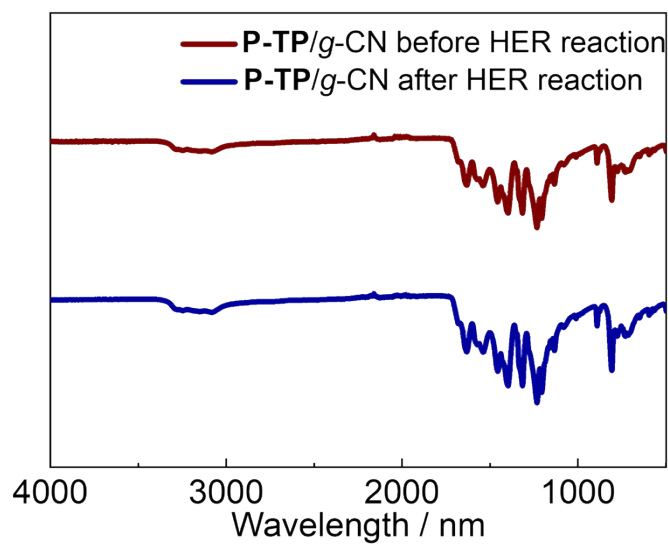

**Fig. S16** FT-IR spectra of P-TP/g-CN before and after HER reaction.

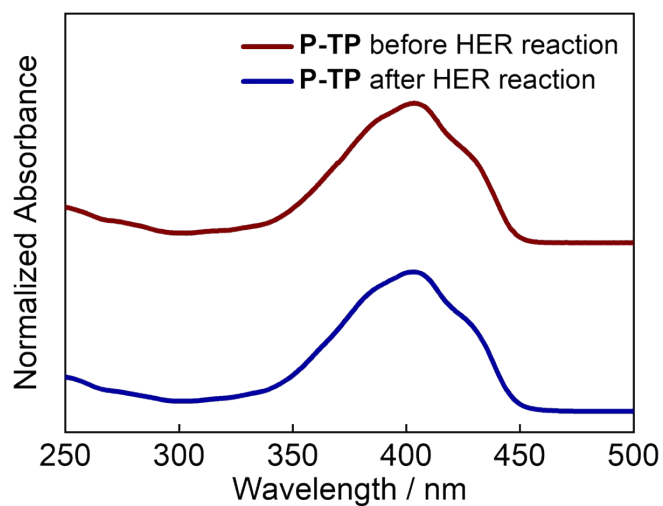

**Fig. S17** UV-Vis spectra of **P-TP** before and after HER reaction.

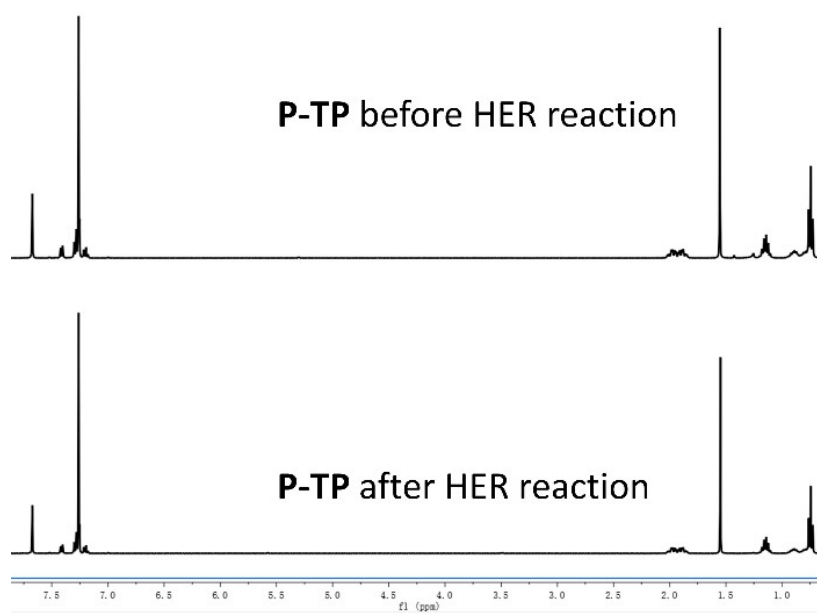

**Fig. S18** <sup>1</sup>H NMR spectra of **P-TP** before and after HER reaction.

### 3. NMR spectra

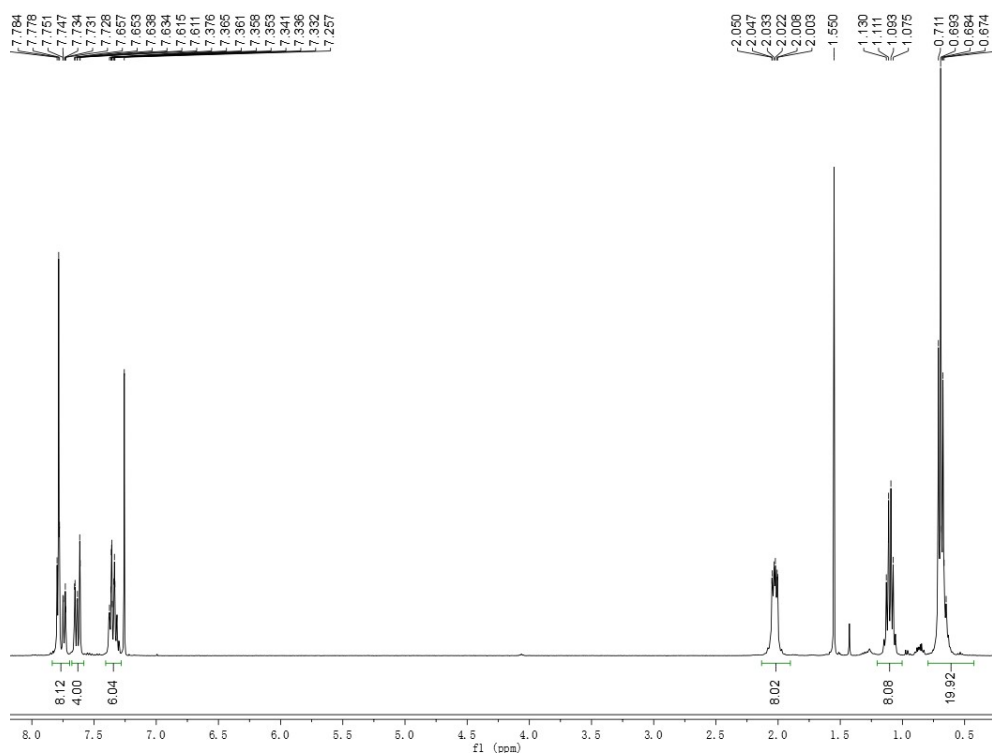

Fig. S19 <sup>1</sup>H NMR spectrum of P-FL.

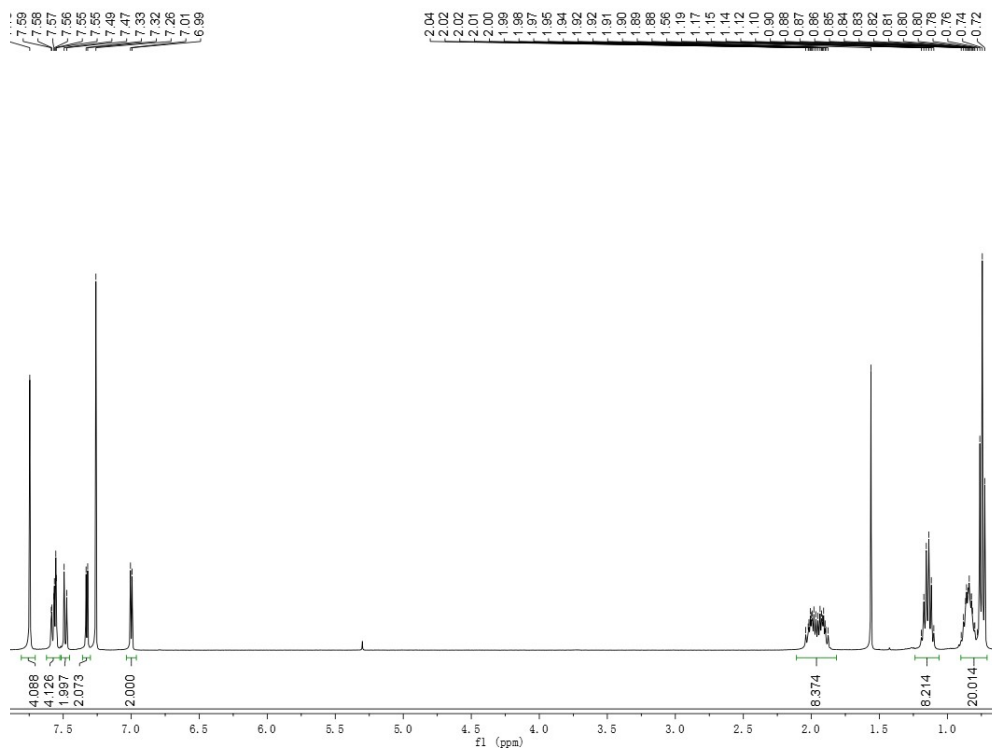

Fig. S20 <sup>1</sup>H NMR spectrum of P-PT.

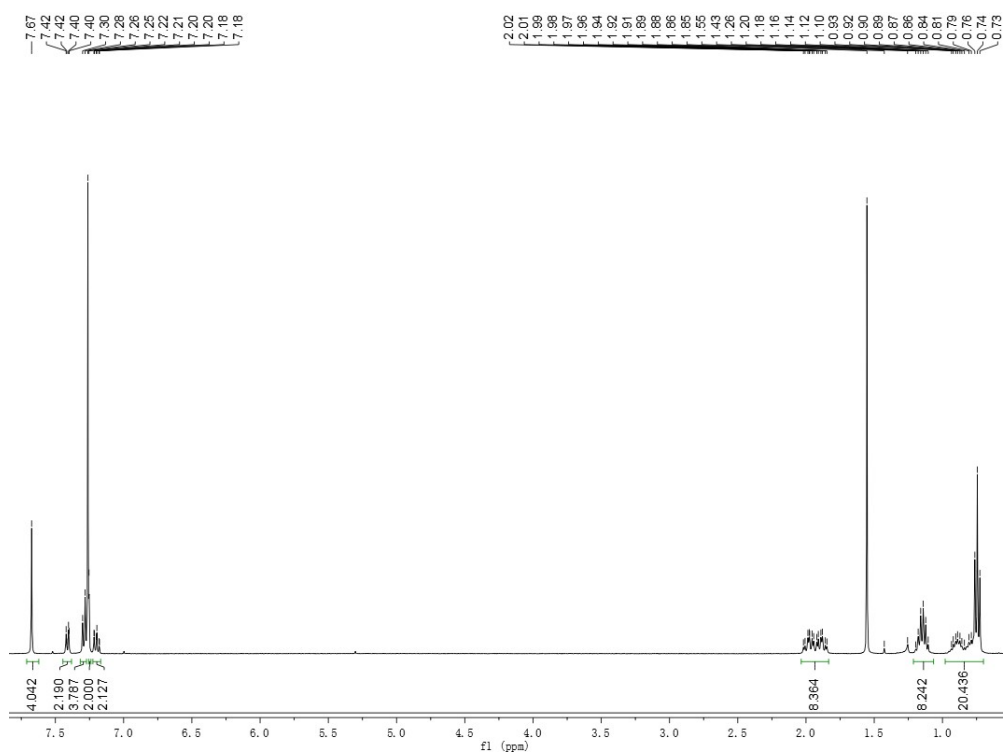

Fig. S21 <sup>1</sup>H NMR spectrum of P-TP.

---

## References

- [1] A. Suryawanshi, P. Dhanasekaran, D. Mhamane, S. Kelkar, S. Patil, N. Gupta, S. Ogale, *Int. J. Hydrogen Energy.*, 2012, **37**, 9584.
- [2] Z. F. Jiang, C. Z. Zhu, W. M. Wan, K. Qian and J. Xie, *J. Mater. Chem. A.*, 2016, **4**, 1806.
- [3] Q. Sun, P. Wang, H. G. Yu and X. F. Wang, *J. Mol. Catal. A: Chem.*, 2016, **424**, 369.
- [4] F. Y. Cheng, H. Yin and Q. J. Xiang, *Appl. Surf. Sci.*, 2017, **391**, 432.
- [5] J. T. Zhang, F. Huang, *Appl. Surf. Sci.*, 2015, **358**, 287.
- [6] K. Li, L. Wang, Z. Chen and Q. H. Xu, *Adv. Funct. Mater.*, 2020, **30**, 2005106.
- [7] H. Yuan, F. Fang, J. Dong, W. Xia, X. Zeng, *Colloids and Surfaces A.*, 2022, **641**, 128575.
- [8] F. Yu, Z. Wang, S. Zhang, H. Ye and H. Tian, *Adv. Funct. Mater.*, 2018, **28**, 1804512.
